# Supplementary material for: New dinuclear Ru(ii) complexes containing free chelating polypyridine sites within the bridging ligands: absorption spectra, luminescence properties, redox behavior and sensing properties
Source: Royal Society of Chemistry journal article supplement (doi:10.1039/b206362j), 2002-12-01
Supplement: figure si-1 caption.doc [file figure%20si-1%20caption.doc]

**Supplementary information**

**Caption to Figure SI-1**.

Top: Absorption spectra of **1** in dichloromethane solution in the absence (thin line) and in the presence (thick line) of acetic acid. Concentrations are: **1**, 2x10-5 M; acetic acid, 2x10-3 M.

Bottom: Absorption spectra of **2** in acetonitrile solution in the absence (thin line) and in the presence (thick line) of acetic acid. Concentrations are: **2**, 2x10-5 M; acetic acid, 2x10-3 M.
